# Supplementary material for: Construction of continuously expandable single-cell atlases through integration of heterogeneous datasets in a generalized cell-embedding space
Source: Research Square preprint supplement (doi:10.21203/rs.3.rs-398163/v1), 2021-04-28
Supplement: Supplementary file 3 [file 039761e4186d1c5381ae6a0e.xlsx]

## Sheet: inflammatory genes
ABCA1
ABI1
ACVR1B
ACVR2A
ADGRE1
ADM
ADORA2B
ADRM1
AHR
APLNR
AQP9
ATP2A2
ATP2B1
ATP2C1
AXL
BDKRB1
BEST1
BST2
BTG2
C3AR1
C5AR1
CALCRL
CCL17
CCL2
CCL20
CCL22
CCL24
CCL5
CCL7
CCR7
CCRL2
CD14
CD40
CD48
CD55
CD69
CD70
CD82
CDKN1A
CHST2
CLEC5A
CMKLR1
CSF1
CSF3
CSF3R
CX3CL1
CXCL10
CXCL11
CXCL6
CXCL8
CXCL9
CXCR6
CYBB
DCBLD2
EBI3
EDN1
EIF2AK2
EMP3
EREG
F3
FFAR2
FPR1
FZD5
GABBR1
GCH1
GNA15
GNAI3
GP1BA
GPC3
GPR132
GPR183
HAS2
HBEGF
HIF1A
HPN
HRH1
ICAM1
ICAM4
ICOSLG
IFITM1
IFNAR1
IFNGR2
IL10
IL10RA
IL12B
IL15
IL15RA
IL18
IL18R1
IL18RAP
IL1A
IL1B
IL1R1
IL2RB
IL4R
IL6
IL7R
INHBA
IRAK2
IRF1
IRF7
ITGA5
ITGB3
ITGB8
KCNA3
KCNJ2
KCNMB2
KIF1B
KLF6
LAMP3
LCK
LCP2
LDLR
LIF
LPAR1
LTA
LY6E
LYN
MARCO
MEFV
MEP1A
MET
MMP14
MSR1
MXD1
MYC
NAMPT
NDP
NFKB1
NFKBIA
NLRP3
NMI
NMUR1
NOD2
NPFFR2
OLR1
OPRK1
OSM
OSMR
P2RX4
P2RX7
P2RY2
PCDH7
PDE4B
PDPN
PIK3R5
PLAUR
PROK2
PSEN1
PTAFR
PTGER2
PTGER4
PTGIR
PTPRE
PVR
RAF1
RASGRP1
RELA
RGS1
RGS16
RHOG
RIPK2
RNF144B
ROS1
RTP4
SCARF1
SCN1B
SELE
SELENOS
SELL
SEMA4D
SERPINE1
SGMS2
SLAMF1
SLC11A2
SLC1A2
SLC28A2
SLC31A1
SLC31A2
SLC4A4
SLC7A1
SLC7A2
SPHK1
SRI
STAB1
TACR1
TACR3
TAPBP
TIMP1
TLR1
TLR2
TLR3
TNFAIP6
TNFRSF1B
TNFRSF9
TNFSF10
TNFSF15
TNFSF9
TPBG
VIP

## Sheet: cytokines genes
COVID-19: consider cytokine storm syndromes and immunosuppression, 2020.3, THE LANCET	Exuberant elevation of IP-10, MCP-3 and IL-1ra during SARS-CoV-2 2 infection is associated with disease severity and fatal outcome, 2020.3, MedRxiv	High-dimensional immune profiling by mass cytometry revealed immunosuppression and dysfunction of immunity in COVID-19 patients, 2020.4, cellular & molecular immunology	Immune cell profiling of COVID-19 patients in the recovery stage by single-cell sequencing, 2020.5, cell discovery	Immunology of COVID-19: Current State of the Science, 2020.5, Immunity	Single-cell landscape of bronchoalveolar immune cells in patients with COVID-19, 2020.5, Nature Medicine	Viral and host factors related to the clinical outcome of COVID-19,2020.5.13, Nature	Pathogenic T-cells and inflammatory monocytes incite inflammatory storms in severe COVID-19 patients, 2020.6, National Science Review	A consensus Covid-19 immune signature combines immuno-protection with discrete sepsis-like traits associated with poor prognosis., 2020.6, medRxiv	Deep immune profiling of COVID-19 patients reveals distinct immunotypes with therapeutic implications, 2020.7, Science	Immunophenotyping of COVID-19 and influenza highlights the role of type I interferons in development of severe COVID-19, 2020.7, Science Immunology	Single-cell analysis of two severe COVID-19 patients reveals a monocyte-associated and tocilizumab-responding cytokine storm, 2020.8, Nature Communications	Systems biological assessment of immunity to mild versus severe COVID-19 infection in humans, 2020.8, Science	Loss of Bcl-6-expressing T follicular helper cells and germinal centers in COVID-19, 2020.8, Cell	An inflammatory cytokine signature predicts COVID-19 severity and survival,2020.8.24, Nature Medicine	Kanehisa, M. and Goto, S.; KEGG: Kyoto Encyclopedia of Genes and Genomes. Nucleic Acids Res. 28, 27-30 (2000). (Kegg DataBase)
IL2	CXCL10	TGFB1	IL1B	IL1B	IL1B	IL6	CSF2	IL6	CXCL10	TNF	TNF	IL6	TNF	IL6	IL17C
IL7	CCL7		LTA	IL18	IL6	CXCL8	IL6	IL10	CXCL9	IL1B	CCL3	CXCL10		IL8	TNFSF10
CSF3	IL1RN		IFNG	IL6	TNF		IFNG	CXCL8	CCL2	IL18	CCL4	CCL7		TNF	FGF7
CXCL10	CSF1		CSF1	TNF	CCL2			CXCL10	IL1RN		CCL20	HGF		IL1B	XCL1
CCL2	IFNG		CSF2	CCL2	CCL3			IFNG	CCL5		IL1B	OSM			FGF13
CCL3	IL6		LTB	CCL7	CCL4			IFNA1	CCL11		IL6	TNFSF14			LIF
TNF	IL2RA		IL6	CCL12	CCL7				TNF		IL10	IFNA1			TGFB3
TFTN1	IL10		TNFSF13	CXCL8	CXCL9				HGF		CXCL2	SA100A12			INHBE
IL6	IL18		IL18	CCL3	CXCL10				IFNA2		CXCL3	FGF19			CERS1
	HGF		IL2	CXCL9	CXCL11						CXCL8	CXCL5			TXLNA
	CXCL9		IL4	CXCL10	CXCL1						CXCL9	CCL4			IFNW1
	CSF3			CXCL11	CXCL2						CCL3L1	CCL8			IL22
	CCL3				CXCL3						CCL4L2	CCL19			XCL2
	CCL27				CXCL8							CXCL11			CCL25
					CCL3L1							CCL3			CCL16
					CCL8							IL18R1			CD40LG
					CXCL16							CSF1			IL20
												TNF			FASLG
												CCL20			TPO
												TGFA			SCYL3
												IFNB1			PF4V1
															TNFSF8
															GDF15
															IL1A
															VEGFA
															GDF7
															BMP6
															PDGFA
															IL21
															ABCD-1
															ABCD-2
															PDGFB
															TNFSF4
															FAM19A1
															HBEGF
															PDGFD
															IL12RB2
															GH1
															VEGFB
															MIP3B
															IL27
															PF4
															BMP8B
															TNFSF12
															IL15
															SCYL2
															SCYL1
															TSLP
															GDF11
															SDF1B
															INHBA
															PPBP
															FGF11
															IFNG-AS1
															FGF22
															VEGFC
															CCL18
															TNFSF11
															IL12A
															EBI3
															AMH
															IL26
															IL32
															PDGFC
															FGF23
															IGF1
															IL1F11
															CCL28
															CLCF1
															TNFSF9
															BMP3
															IL24
															GDF10
															CXCL6
															GDF9
															IL23A
															IL16
															CD70
															IL5
															FGF9
															IFNL1
															TSC1
															FGF2
															IL23R
															IL1G
															SPP1
															IL12RB1
															BMP4
															IL13
															TPAR1
															TGFB2
															FAM19A2
															AGIF3
															EDA
															MIF
															TNFSF13B
															BMP7
															FGF18
															CCL23
