# Supplementary material for: Construction of continuously expandable single-cell atlases through integration of heterogeneous datasets in a generalized cell-embedding space
Source: Research Square preprint supplement (doi:10.21203/rs.3.rs-398163/v1), 2021-04-28
Supplement: Supplementary file 4 [file 3331f5f15fcea01cbf546cb9.xlsx]

## Sheet: Sheet1
datasets	batches	accession id	protocol	species	source	year	journal
pancreas	pancreas_indrop1	GSE84133	inDrop	Homo sapiens	A single-cell transcriptomic map of the human and mouse pancreas reveals inter- and intra-cell population structure	2016	Cell Systems
	pancreas_indrop2	GSE84133	inDrop	Homo sapiens	A single-cell transcriptomic map of the human and mouse pancreas reveals inter- and intra-cell population structure	2016	Cell Systems
	pancreas_indrop3	GSE84133	inDrop	Homo sapiens	A single-cell transcriptomic map of the human and mouse pancreas reveals inter- and intra-cell population structure	2016	Cell Systems
	pancreas_indrop4	GSE84133	inDrop	Homo sapiens	A single-cell transcriptomic map of the human and mouse pancreas reveals inter- and intra-cell population structure	2016	Cell Systems
	pancreas_celseq	GSE81076	Cel-seq	Homo sapiens	De Novo Prediction of Stem Cell Identity using Single-Cell Transcriptome Data	2016	Cell Stem Cell
	pancreas_celseq2	GSE85241	Cel-seq2	Homo sapiens	A single-cell transcriptome atlas of the human pancreas	2016	Cell Systems
	pancreas_smartseq2	E-MTAB-5061	Smart-seq2	Homo sapiens	Single-Cell Transcriptome Profiling of Human Pancreatic Islets in Health and Type 2 Diabetes	2016	Cell Metabolism
	pancreas_fluidigmc1	GSE86469	Fluidigm-C1	Homo sapiens	Single-cell transcriptomes identify human islet cell signatures and reveal cell-type-specific expression changes in type 2 diabetes	2017	Genome Research
pancreas (query)	pancreas_GSE83139	GSE83139	Smart-seq	Homo sapiens	Single cell RNA-seq of human pancreatic endocrine cells	2016	Diabetes
	pancreas_GSE114297	GSE114297	10X	Homo sapiens	Pseudotime Ordering of Single Human Beta-Cells Reveals States of Insulin Production and Unfolded Protein Response	2018	Diabetes
	pancreas_GSE81547	GSE81547	Smart-seq2	Homo sapiens	Single-Cell Analysis of Human Pancreas Reveals Transcriptional Signatures of Aging and Somatic Mutation Patterns	2017	Cell
heart	Harvard-Nuclei	ERP123138	10X	Homo sapiens	Cells of the adult human heart	2020	Nature
	Harvard-Nuclei	ERP123138	10X	Homo sapiens	Cells of the adult human heart	2020	Nature
PBMC	pbmc_3p	10X Datasets	10X_3p	Homo sapiens	https://support.10xgenomics.com/single-cell-gene-expression/datasets/2.1.0/pbmc8k
	pbmc_5p	10X Datasets	10X_5p	Homo sapiens	https://support.10xgenomics.com/single-cell-gene-expression/datasets/2.1.0/vdj_v1_pbmc_5gex
liver	LIVER_GSE115469	GSE115469	10X	Homo sapiens	Single cell RNA sequencing of human liver reveals distinct intrahepatic macrophage populations	2018	Nature Communication
	LIVER_GSE124395	GSE124395	Cel-seq2	Homo sapiens	A human liver cell atlas reveals heterogeneity and epithelial progenitors	2019	Nature
NSCLC	NSCLC_EMTAB6149	E-MTAB-6149	10X	Homo sapiens	Phenotype molding of stromal cells in the lung tumor microenvironment	2018	Nature Medicine
	NSCLC_GSE127465	GSE127465	Smart-seq2	Homo sapiens	Single-Cell Transcriptomics of Human and Mouse Lung Cancers Reveals Conserved Myeloid Populations across Individuals and Species	2019	Immunity
	NSCLC_GSE117570	GSE117570	10X	Homo sapiens	Dissecting intratumoral myeloid cell plasticity by single cell RNA-seq	2019	Cancer Medicine
	NSCLC_GSE131907	GSE131907	10X	Homo sapiens	Single-cell RNA sequencing demonstrates the molecular and cellular reprogramming of metastatic lung adenocarcinoma	2020	Nature Communication
fetal atlas	GSE156793	GSE156793	sci-RNA-seq3	Homo sapiens	A human cell atlas of fetal gene expression	2020	Science
	GSE134355	GSE134355	Microwell-seq	Homo sapiens	Construction of a human cell landscape at single-cell level	2020	Nature
brain	snATAC	GSE126724	snATAC-seq	Mus musculus	Comprehensive analysis of single cell ATAC-seq data with SnapATAC	2020	Nature Communication
	10X	10X Datasets	10X	Mus musculus	https://support.10xgenomics.com/single-cell-atac/datasets/1.1.0/atac_v1_adult_brain_fresh_5k?	2019
PBMC(cross-modality)	RNA	10X Datasets	10X	Homo sapiens	https://support.10xgenomics.com/single-cell-gene-expression/datasets/3.0.0/pbmc_10k_v3	2018
	ATAC	10X Datasets	10X	Homo sapiens	https://support.10xgenomics.com/single-cell-atac/datasets/1.0.1/atac_v1_pbmc_10k	2018
melanoma	SKCM_GSE72056	GSE72056	Smart-seq2	Homo sapiens	Dissecting the multicellular ecosystem of metastatic melanoma by single-cell RNA-seq	2016	Science
	SKCM_GSE123139	GSE123139	MARS-seq	Homo sapiens	Dysfunctional CD8 T Cells Form a Proliferative, Dynamically Regulated Compartment within Human Melanoma	2019	Cell
bronchial epithelium	bronchial_epithelium	GSE102580	inDrop	Homo sapiens	A single-cell atlas of the airway epithelium reveals the CFTR-rich pulmonary ionocyte	2018	Nature
mouse atlas	mouse_atlas_droplet	GSE109774	10X	Mus musculus	Single-cell transcriptomics of 20 mouse organs creates a Tabula Muris	2018	Nature
	mouse_atlas_facs	GSE109774	Smart-seq2	Mus musculus	Single-cell transcriptomics of 20 mouse organs creates a Tabula Muris	2018	Nature
	mouse_atlas_mca	GSE108097	Microwell-seq	Mus musculus	Mapping the Mouse Cell Atlas by Microwell-Seq	2018	Cell
tabula_muris_aging	tabula_muris_aging_droplet	GSE132042	10X	Mus musculus	A single-cell transcriptomic atlas characterizes ageing tissues in the mouse	2020	Nature
	tabula_muris_aging_facs	GSE132042	Smart-seq2	Mus musculus	A single-cell transcriptomic atlas characterizes ageing tissues in the mouse	2020	Nature
mouse lung	mouse_lung	GSE132901	10X	Mus musculus	Murine single-cell RNA-seq reveals cell-identity- and tissue-specific trajectories of aging	2019	Genome Research
mouse kidney	mouse_kidney	GSE132901	10X	Mus musculus	Murine single-cell RNA-seq reveals cell-identity- and tissue-specific trajectories of aging	2019	Genome Research
human atlas	GSE134355	GSE134355	Microwell-seq	Homo sapiens	Construction of a human cell landscape at single-cell level	2020	Nature
	GSE159929	GSE159929	10X	Homo sapiens	Single-cell transcriptome profiling of an adult human cell atlas of 15 major organs	2020	Genome Biology
human skin	skin_GSE130973	GSE130973	10X	Homo sapiens	Single-cell transcriptomes of the human skin reveal age-related loss of fibroblast priming	2020	Communications Biology
	skin_GSE147424	GSE147424	10X	Homo sapiens	Single-cell transcriptome analysis of human skin identifies novel fibroblast subpopulation and enrichment of immune subsets in atopic dermatitis	2020	Journal of Allergy and Clinical Immunology
COVID-19 atlas	GSE150861	GSE150861	10X	Homo sapiens	Single-cell analysis of two severe COVID-19 patients reveals a monocyte-associated and tocilizumab-responding cytokine storm	2020	Nature Communication
	GSE150728	GSE150728	Seq-Well	Homo sapiens	A single-cell atlas of the peripheral immune response in patients with severe COVID-19	2020	Nature Medicine
	HRA000150	HRA000150	10X	Homo sapiens	Single-cell landscape of immunological responses in patients with COVID-19	2020	Nature Immunology
	GSE149689	GSE149689	10X	Homo sapiens	Immunophenotyping of COVID-19 and influenza highlights the role of type I interferons in development of severe COVID-19	2020	Science Immunology
	GSE154567	GSE154567	10X	Homo sapiens	Cell-Type-Specific Immune Dysregulation in Severely Ill COVID-19 Patients	2020	Cell Reports
	EGAS00001004571_10X	EGAS00001004571	10X	Homo sapiens	Severe COVID-19 Is Marked by a Dysregulated Myeloid Cell Compartment	2020	Cell
	EGAS00001004571_BD_Rhapsody	EGAS00001004571	BD Rhapsody	Homo sapiens	Severe COVID-19 Is Marked by a Dysregulated Myeloid Cell Compartment	2020	Cell
	00803_MGH_Broad	COVID-19 Cell Atlas	CITE-seq	Homo sapiens	https://www.covid19cellatlas.org/index.patient.html	2020
	AirwayWash-PBMC	COVID-19 Cell Atlas	10X	Homo sapiens	https://www.covid19cellatlas.org/index.patient.html	2020
	immunodeficiency_PMBCs	COVID-19 Cell Atlas	10X	Homo sapiens	https://www.covid19cellatlas.org/index.patient.html	2020
	CS4	GSE158055	10X	Homo sapiens	COVID-19 immune features revealed by a large-scale single cell transcriptome atlas	2021	cell
